# Supplementary material
Source: Springer Nature journal article supplement (https://www.springermedizin.de/resource/supplementary/13256_2011_2058_MOESM1_ESM.pdf/9649776)

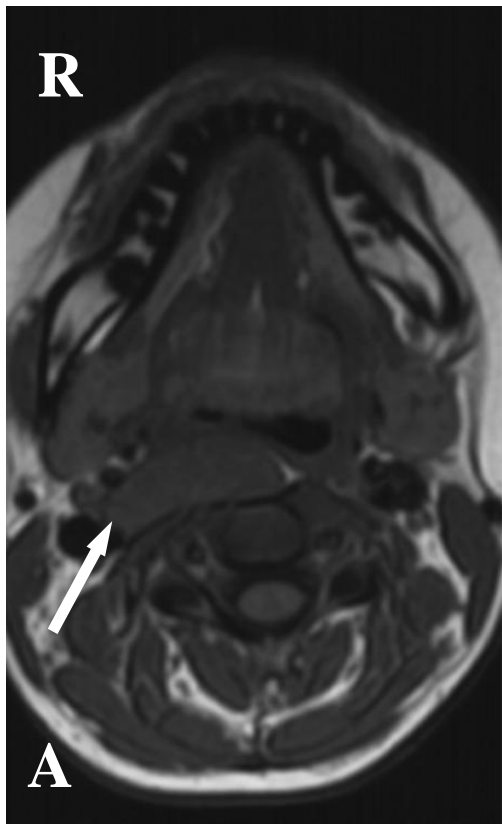

**T1-weighted image**

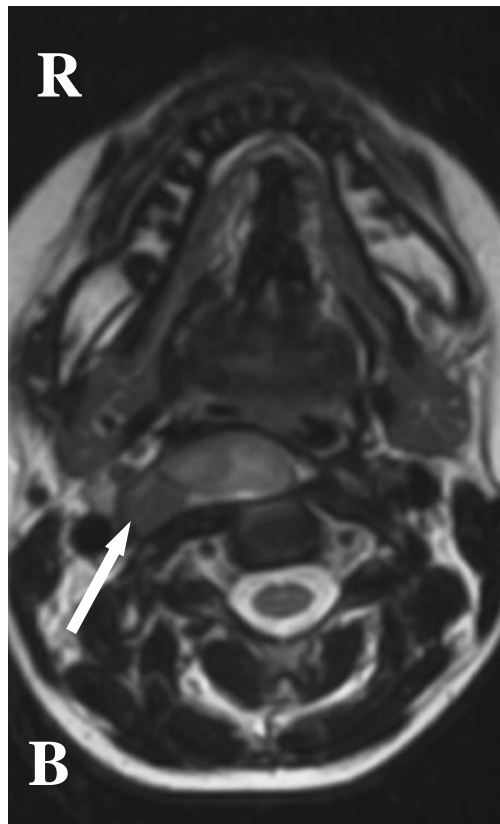

**T2-weighted image**

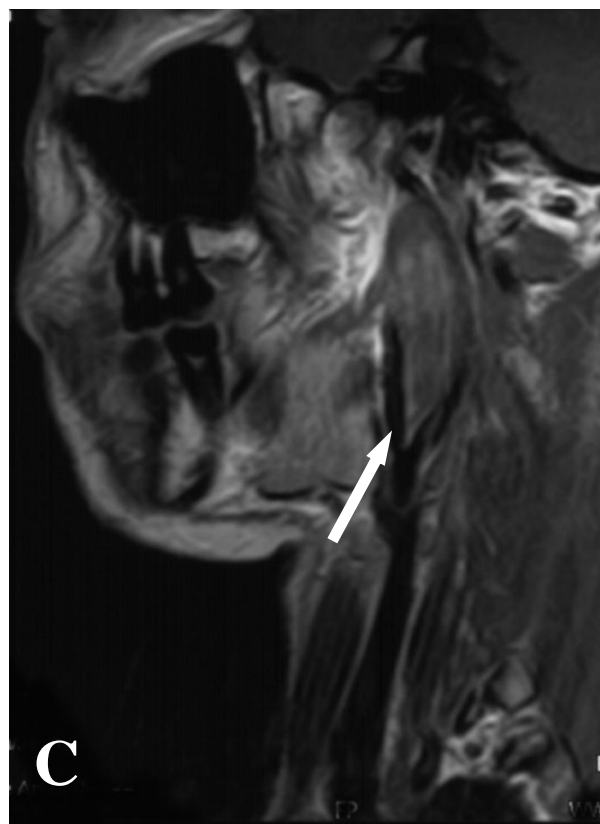

**Contrast enhanced  
T1-weighted**

Supplement: MOESM1 [file 9649776]
